# Supplementary material for: Evaluation of Different Registration Algorithms to Reduce Motion Artifacts in CT-Thermography (CTT)
Source: MDPI journal article supplement (doi:10.3390/diagnostics13122076), 2023-06-15
Supplement: s1 [file s1]

**Supplementary Table S1:** Reader details.

| Reader No. | Level of experience in years | Focus        |
|------------|------------------------------|--------------|
| Reader 1   | 11                           | intervention |
| Reader 2   | 8                            | intervention |
| Reader 3   | 5                            | intervention |
| Reader 4   | 6                            | diagnostic   |
| Reader 5   | 5                            | diagnostic   |
| Reader 6   | 4                            | diagnostic   |
| Reader 7   | 3                            | diagnostic   |
| Reader 8   | 5                            | diagnostic   |
| Reader 9   | 23                           | intervention |
| Reader 10  | 21                           | intervention |
| Reader 11  | 6                            | intervention |
| Reader 12  | 6                            | diagnostic   |
| Reader 13  | 7                            | diagnostic   |
| Reader 14  | 6                            | diagnostic   |
| Reader 15  | 12                           | intervention |
